# Supplementary material for: TRIM2 Selectively Regulates Inflammation-Driven Pathological Angiogenesis without Affecting Physiological Hypoxia-Mediated Angiogenesis
Source: MDPI journal article supplement (doi:10.3390/ijms25063343), 2024-03-15
Supplement: s1 [file s1]

## SUPPLEMENTAL FIGURE S1

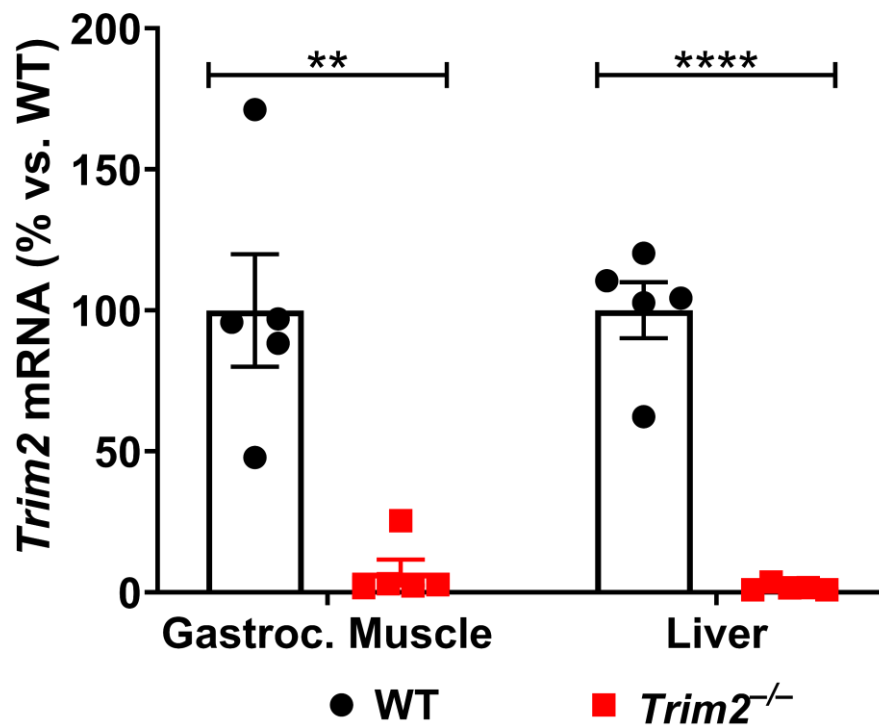

**Supplemental Figure S1:** Mouse *Trim2* mRNA levels were determined using qPCR from gastrocnemius muscle and liver tissues from wildtype (WT) and *Trim2*<sup>-/-</sup> mice ( $N = 5/\text{group}$ ). Results are mean $\pm$ SEM and normalized to WT mice. \*\*  $p < 0.01$ , \*\*\*\*  $p < 0.0001$  by unpaired student's  $t$ -test.

## SUPPLEMENTAL FIGURE S2

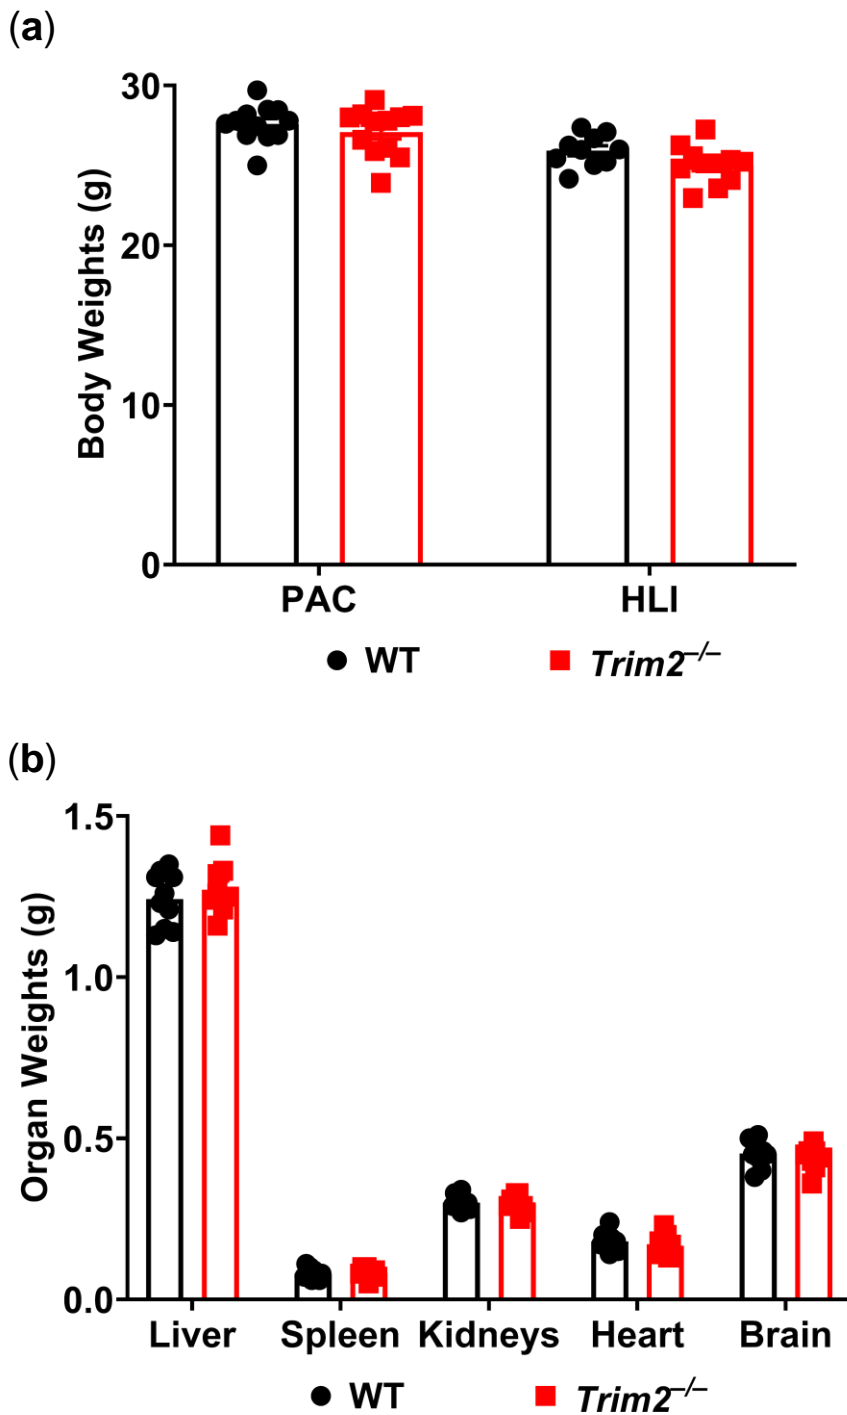

**Supplemental Figure S2:** (a) Total body weight of wildtype (WT) and *Trim2*<sup>-/-</sup> mice at the conclusion of either the periarterial cuff (PAC, *N*=12/group) or hindlimb ischemia (HLI, *N*=10–11/group) studies. (b) Weights of individual organs (*N*=10/group). Results are mean ± SEM and normalized to WT mice.

# SUPPLEMENTAL FIGURE S3

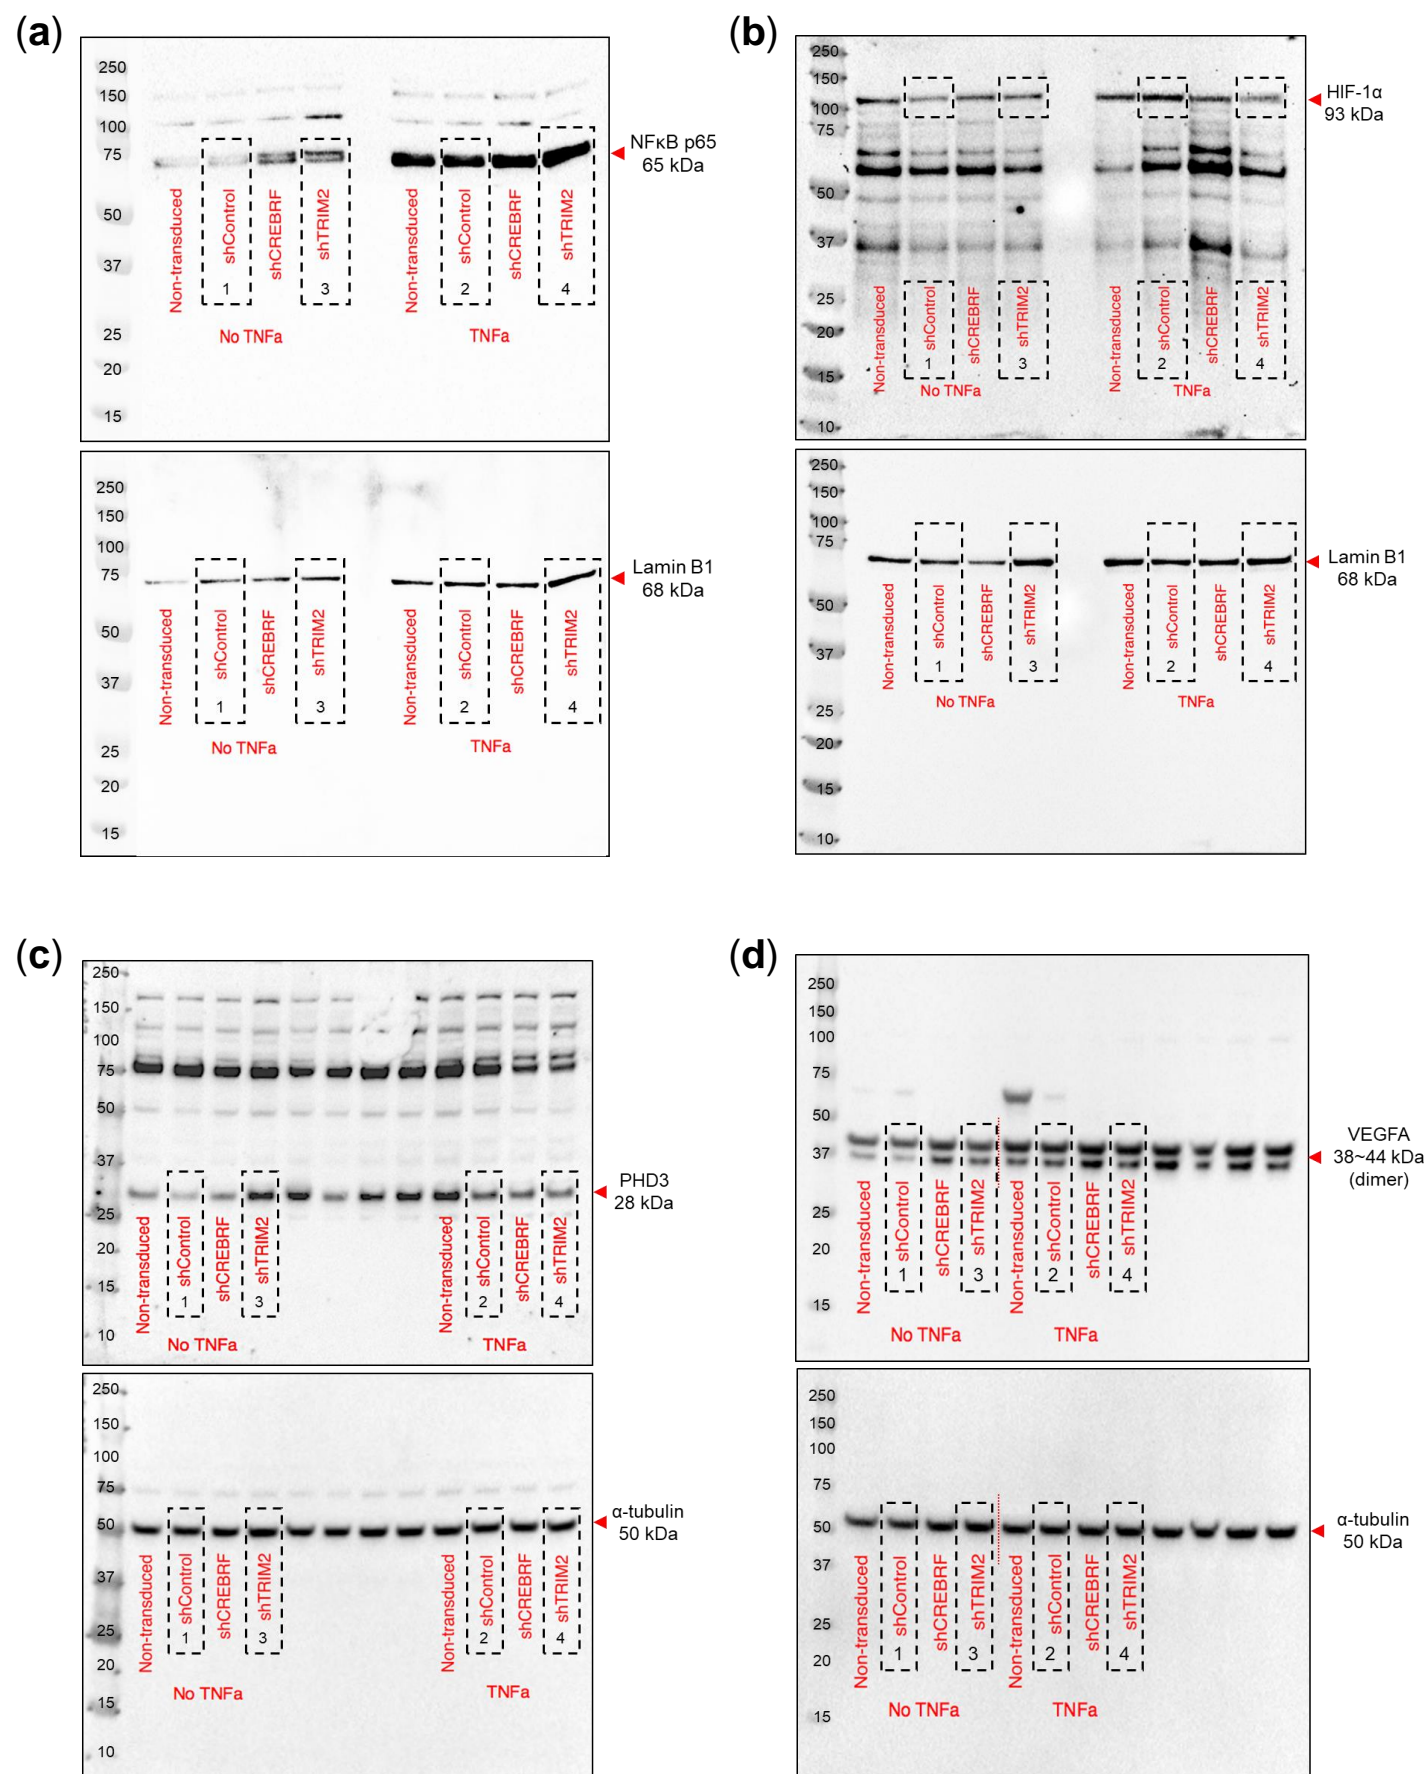

**Supplemental Figure S3:** Full blots of **(a)** NFκB p65 and Lamin B1 for Figure 3h; **(b)** HIF-1α and Lamin B1 for Figure 3i; **(c)** PHD3 and α-tubulin for Figure 3j; and **(d)** VEGFA and α-tubulin for Figure 3k. Dotted lines show the cropping location and the order in which the bands are presented.

# SUPPLEMENTAL FIGURE S4

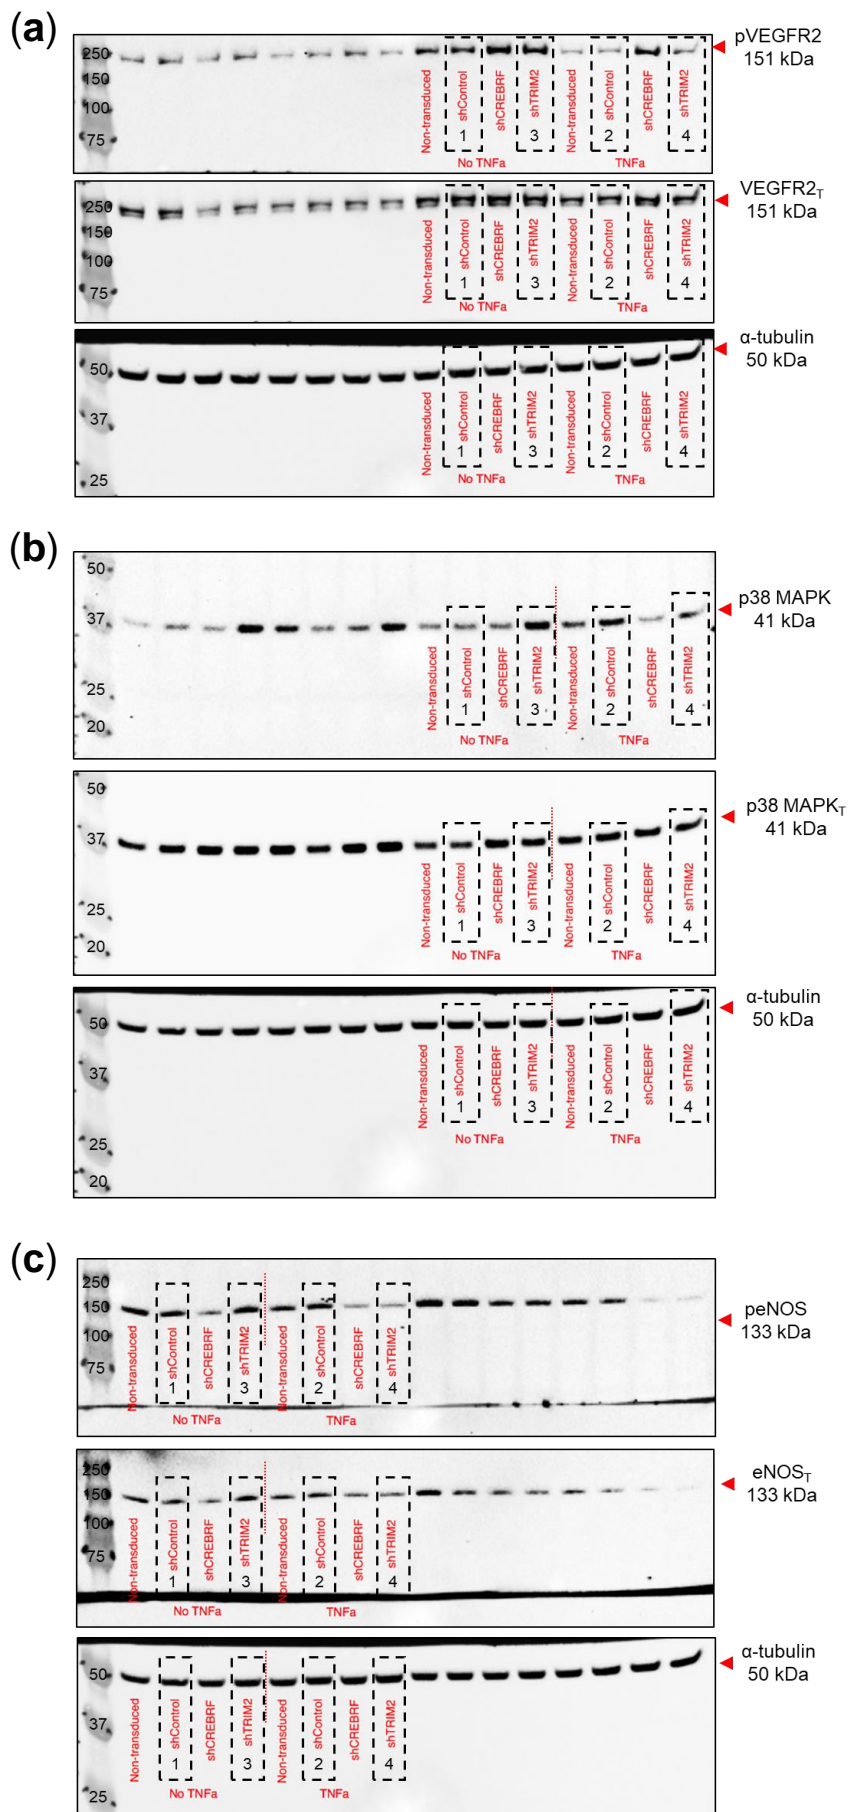

**Supplemental Figure S4:** Full blots of **(a)** phosphorylated (Tyr<sup>1175</sup>) VEGFR2, total VEGFR2 and α-tubulin for Figure 3l; **(b)** phosphorylated (Thr<sup>180</sup>/Tyr<sup>182</sup>) p38 MAPK, total p38 MAPK and α-tubulin for Figure 3m; and **(c)** phosphorylated (Ser<sup>1177</sup>) eNOS, total eNOS and α-tubulin for Figure 3n. Dotted lines show the cropping location and the order in which the bands are presented.

# SUPPLEMENTAL FIGURE S5

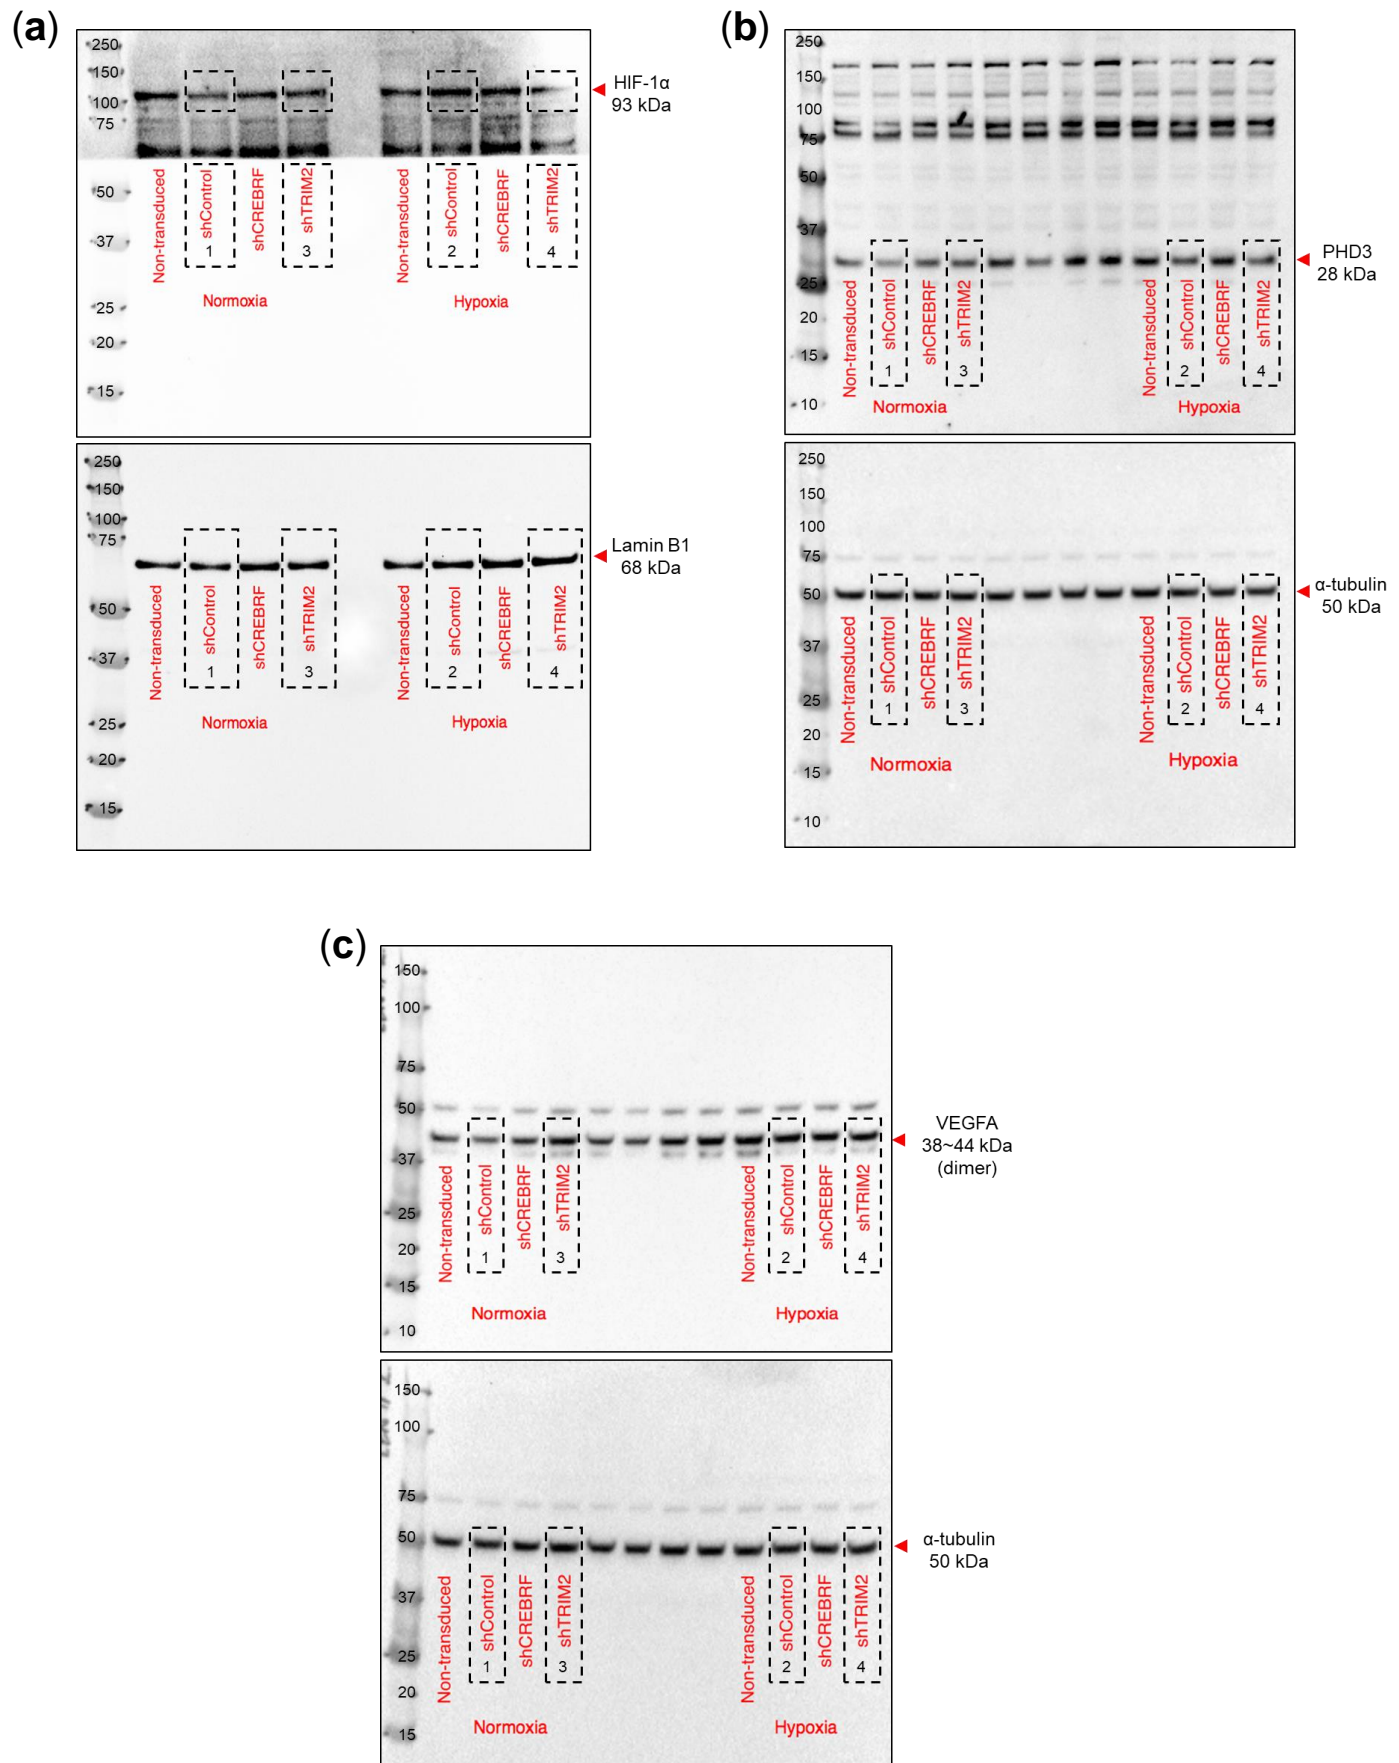

**Supplemental Figure S5:** Full blots of **(a)** HIF-1α and Lamin B1 for Figure 5g; **(b)** PHD3 and α-tubulin for Figure 5h; and **(c)** VEGFA and α-tubulin for Figure 5i. Dotted lines show the cropping location and the order in which the bands are presented.



# SUPPLEMENTAL FIGURE S6

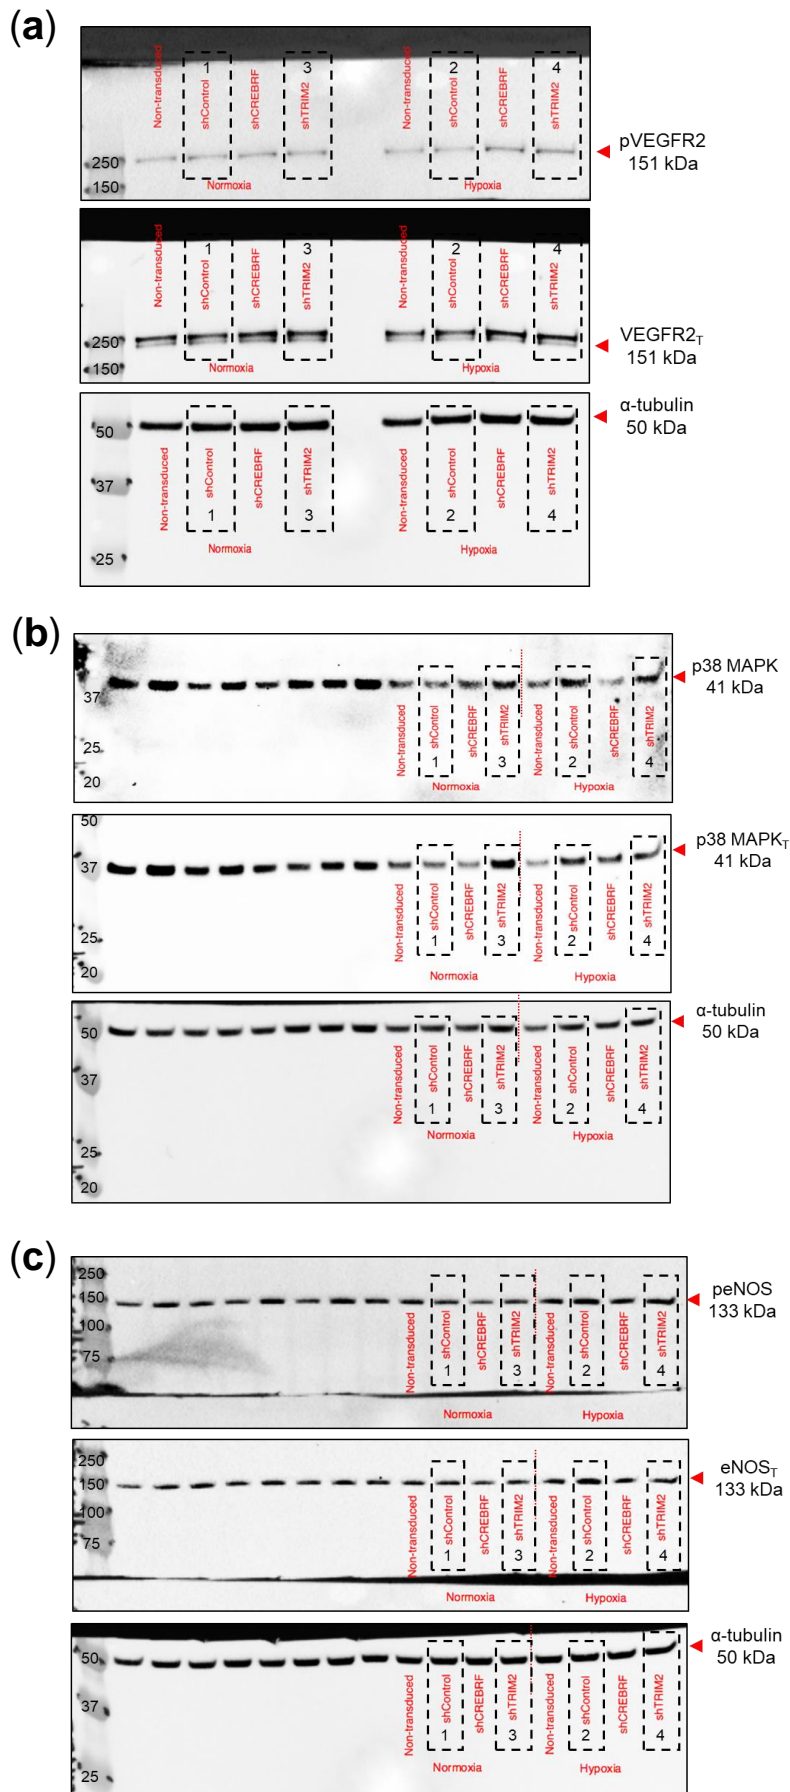

**Supplemental Figure S6:** Full blots of (a) phosphorylated (Tyr<sup>1175</sup>) VEGFR2, total VEGFR2 and  $\alpha$ -tubulin for Figure 5j; (b) phosphorylated (Thr<sup>180</sup>/Tyr<sup>182</sup>) p38 MAPK, total p38 MAPK and  $\alpha$ -tubulin for Figure 5k; and (c) phosphorylated (Ser<sup>1177</sup>) eNOS, total eNOS and  $\alpha$ -tubulin for Figure 5l. Dotted lines show the cropping location and the order in which the bands are presented.
